# Supplementary material for: Highly Similar Tetramerization Domains from the p53 Protein of Different Mammalian Species Possess Varying Biophysical, Functional and Structural Properties
Source: MDPI journal article supplement (doi:10.3390/ijms242316620), 2023-11-22
Supplement: s1 [file s1]

## Supplementary Materials

Contents:

**Supplemental Table S1.** Molecular weight of the mammalian p53TD

**Supplemental Table S2.** Data collection and refinement statistics for p53TDs

**Supplemental Figure S1.** Fluorescence images of the reporter assay

**Supplemental Figure S2.** MALDI-TOF MS spectra of the synthesized mammalian p53TD peptides

**Supplemental Figure S3.** CD spectra (A) and thermal denaturation curves of the synthetic and the expressed HU-p53TD peptides

**Supplemental Figure S4.** Overlay of the two key structural differences between the HU-p53TD and the TS-p53TD.

**Supplemental Figure S5.** Overlay of the two key structural differences between the HU-p53TD and the OP-p53TD.

### Supplemental Table S1. Molecular weight of the mammalian p53TD

| Peptides        | Calculated*<br>(M+H <sup>+</sup> ) | Observed** |
|-----------------|------------------------------------|------------|
| Human           | 4190.7                             | 4190.8     |
| Tree shrew      | 4231.8                             | 4233.6     |
| Guinea pig      | 4245.8                             | 4245.9     |
| Chinese hamster | 4100.7                             | 4100.7     |
| Sheep           | 4220.8                             | 4220.9     |
| Opossum         | 4305.9                             | 4305.9     |

\*The calculated  $MH^+$  (average) values were calculated by the protein prospector website at UCSF.

\*\*The observed  $MH^+$  molecular weights of the peptides were measured using MALDI-TOF MS (linear, positive mode).

**Supplemental Table S2** Data collection and refinement statistics for p53TDs

| Dataset                                   | HU-p53TD                    | OP-p53TD                    | TS-p53TD                    |
|-------------------------------------------|-----------------------------|-----------------------------|-----------------------------|
| <b>Data Collection</b>                    |                             |                             |                             |
| Beamline                                  | ID7B2, CHESS                | ID7B2, CHESS                | ID7B2, CHESS                |
| Wavelength (Å)                            | 0.9686                      | 1.0000                      | 1.0000                      |
| Space group                               | P 21 21 21                  | P 21 21 21                  | C 2 2 2                     |
| <b>Unit cell parameters</b>               |                             |                             |                             |
| a, b, c (Å)                               | 30.973, 56.437, 61.656      | 38.275, 50.887, 60.240      | 62.871, 65.806, 32.511      |
| $\alpha, \beta, \gamma$ (°)               | 90, 90, 90                  | 90 90 90                    | 90 90 90                    |
| Resolution range (Å)                      | 41.63 – 1.22 (1.264 – 1.22) | 32.31 – 1.35 (1.398 – 1.35) | 45.46 - 1.16 (1.201 - 1.16) |
| No. of unique reflections                 | 30235 (1953)                | 24100 (1080)                | 21822 (1027)                |
| Multiplicity                              | 5.5 (2.4)                   | 5.6 (1.9)                   | 9.9 (2.8)                   |
| Completeness (%)                          | 91.77 (60.35)               | 90.51 (39.14)               | 91.70 (43.72)               |
| R <sub>merge</sub>                        | 0.04487 (0.2466)            | 0.08437(0.9251)             | 0.04206 (0.3908)            |
| CC <sub>merge</sub>                       | 1.0 (0.959)                 | 0.999 (0.662)               | 1.0 (0.84)                  |
| I/ $\sigma$ (I)                           | 19.68 (2.06)                | 12.46 (0.51)                | 28.35 (1.62)                |
| <b>Refinement Statistics</b>              |                             |                             |                             |
| Resolution (Å)                            | 41.63 – 1.22                | 32.31 – 1.35                | 45.46 - 1.16                |
| Reflections (total/test) <sup>a</sup>     | 30234 (1992)                | 24002 (1992)                | 21817 (2001)                |
| R <sub>work</sub> /R <sub>free</sub> (%)  | 0.1464/0.1764               | 0.1711/0.2025               | 0.1736/0.1915               |
| CC <sub>work</sub>                        | 0.967 (0.937)               | 0.964 (0.474)               | 0.947 (0.891)               |
| CC <sub>free</sub>                        | 0.967 (0.804)               | 0.956 (0.395)               | 0.942 (0.861)               |
| <b>No. of atoms (excluding hydrogens)</b> |                             |                             |                             |
| Protein                                   | 1155                        | 1107                        | 536                         |
| Water                                     | 147                         | 133                         | 99                          |
| <b>B factors</b>                          |                             |                             |                             |
| Protein                                   | 16.87                       | 21.59                       | 16.55                       |
| Water                                     | 29.03                       | 32.73                       | 28.90                       |
| <b>Root-mean-square deviation</b>         |                             |                             |                             |
| Bond length (Å)                           | 0.022                       | 0.011                       | 0.009                       |
| Bond angle (°)                            | 1.74                        | 1.11                        | 1.09                        |
| <b>Ramachandran (%)<sup>b</sup></b>       |                             |                             |                             |
| Favored                                   | 98.39                       | 100.00                      | 100.00                      |
| Outliers                                  | 0.00                        | 0.00                        | 0.00                        |

Values in parentheses are for highest-resolution shell.  $R_{\text{sym}} = \sum \mathbf{hkl} \sum_i |I_{\mathbf{hkl},i} - \langle I_{\mathbf{hkl}} \rangle| / \sum \mathbf{hkl} I_{\mathbf{hkl}}$ , where  $I_{\mathbf{hkl},i}$  is the intensity of an individual measurement of the reflection with Miller indices  $\mathbf{hkl}$  and  $I_{\mathbf{hkl}}$  is the mean intensity of the reflection.  $R_{\text{work}} = \sum \mathbf{hkl} ||F_o| - |F_c|| / \sum \mathbf{hkl} |F_o|$ , where  $|F_o|$  is the observed structure-factor amplitude and  $|F_c|$  is the calculated structure-factor amplitude.  $R_{\text{free}}$  is the R factor based on at least 500 test reflections that were excluded from the refinements. CLS (Canadian Light Source) and CHESS (Cornell High Energy Synchrotron Source).

<sup>a</sup> Reflection for  $F_o > 0$ . <sup>b</sup> MolProbity analysis.

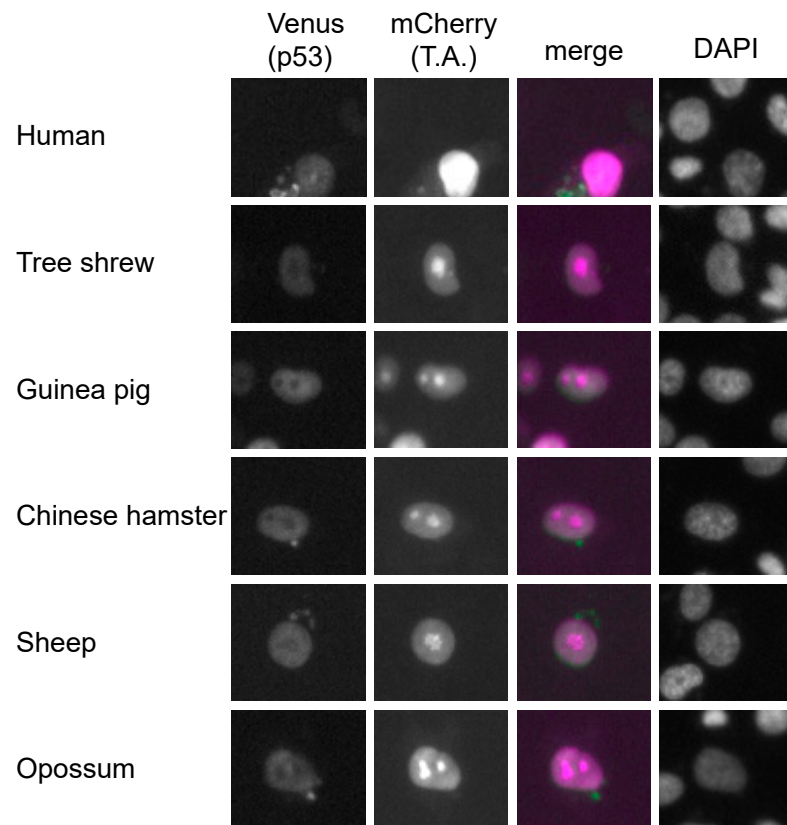

**Supplemental Figure S1: Fluorescence images of the reporter assay.** Chimeric p53 protein (Venus), p53-dependent transcriptional activity (mCherry), merged images of Venus (green) and mCherry (magenta), and DAPI staining were shown.

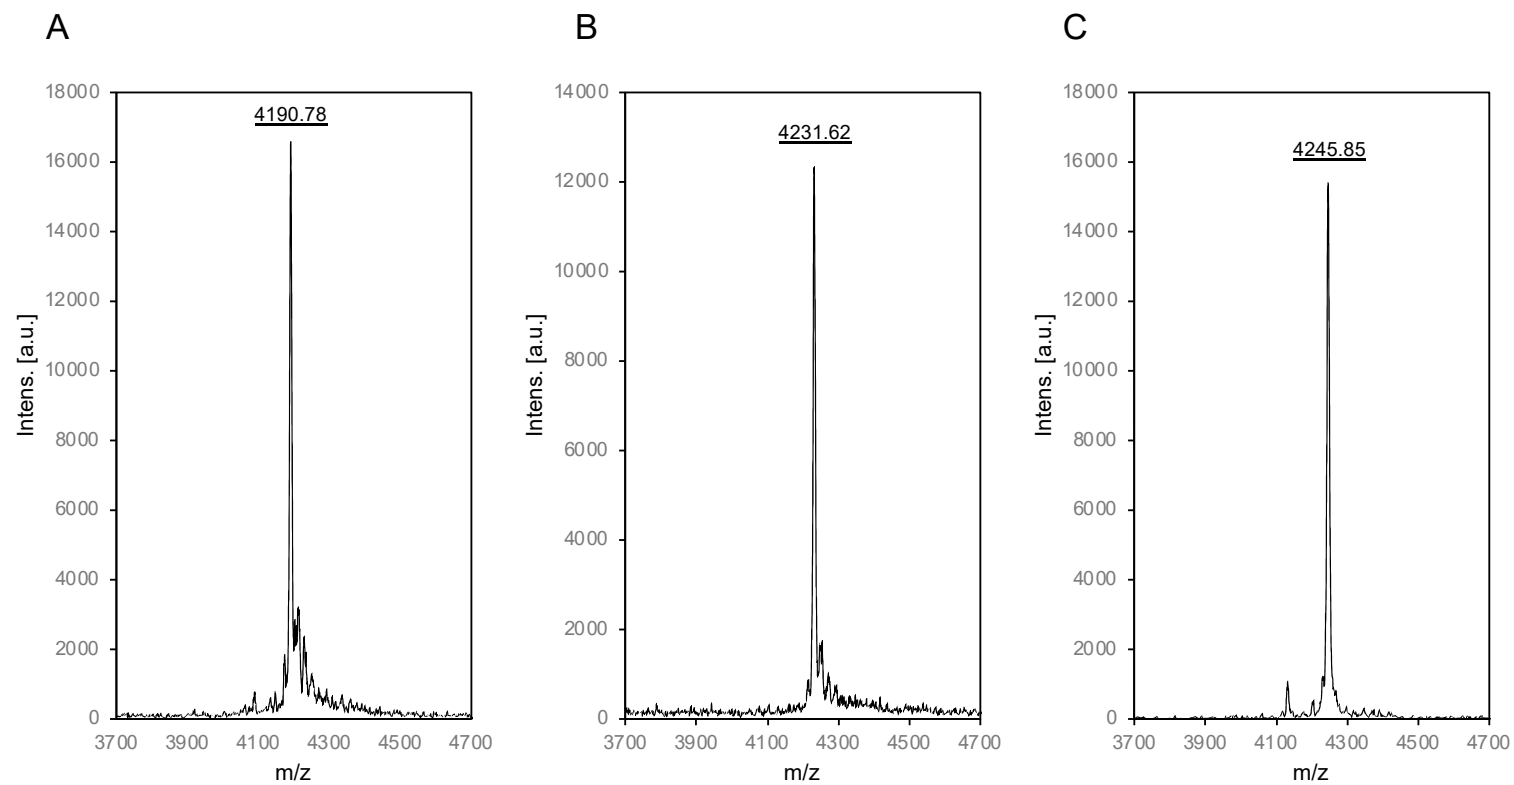

**Supplemental Figure S2.** MALDI-TOF MS spectra of the synthesized mammalian p53TD peptides. (A) Human, (B) Tree shrew, (C) Guinea pig, (D) Chinese hamster, (E) Sheep, (F) Opossum

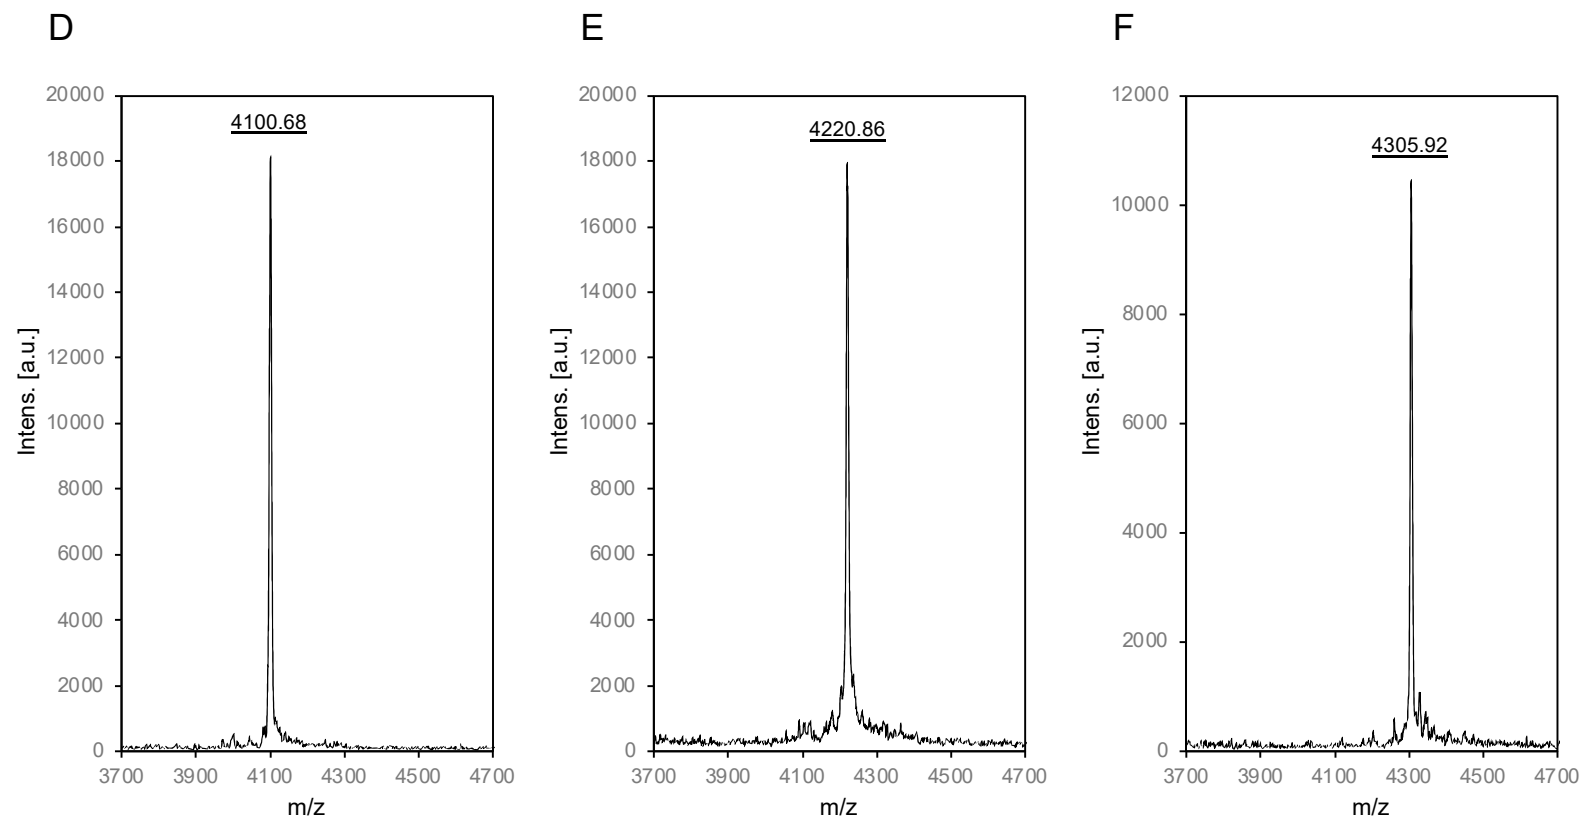

**Supplemental Figure S2.** MALDI-TOF MS spectra of the synthesized mammalian p53TD peptides. (A) Human, (B) Tree shrew, (C) Guinea pig, (D) Chinese hamster, (E) Sheep, (F) Opossum

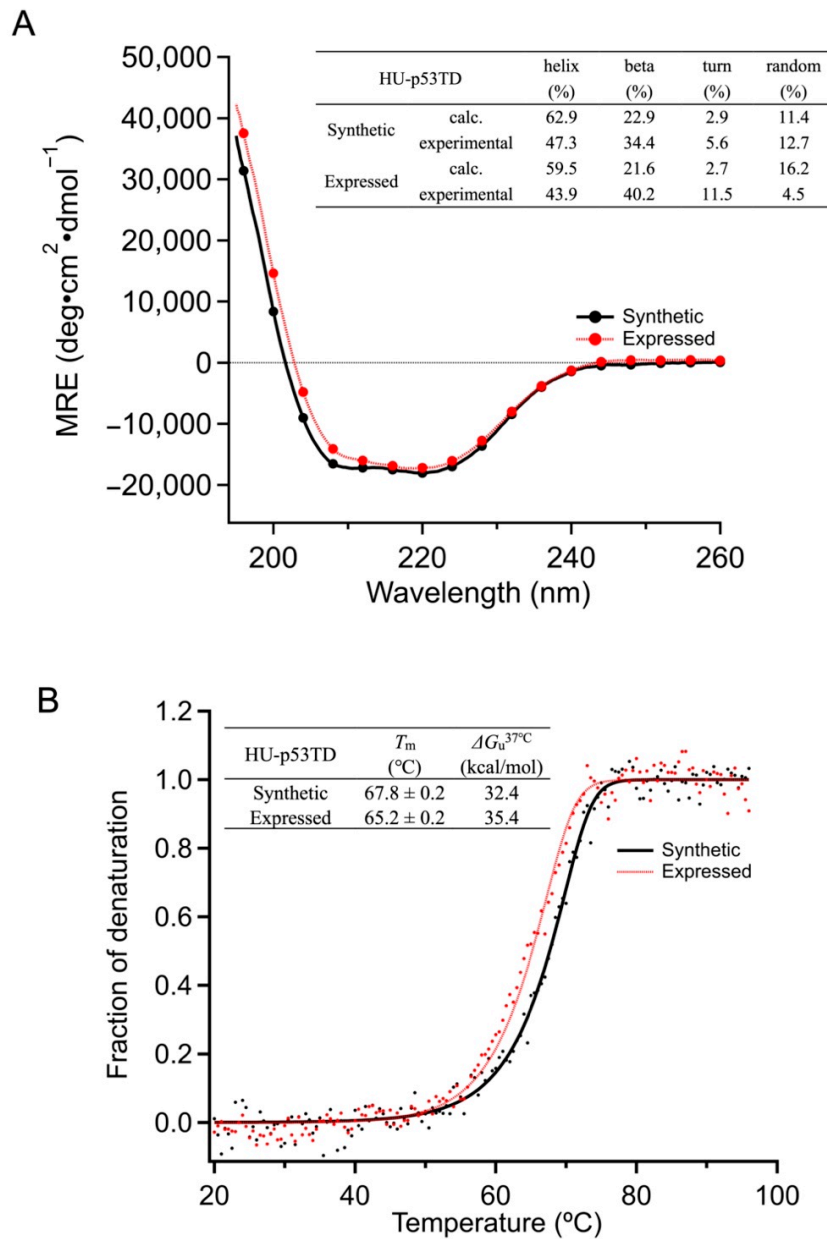

**Supplemental Figure S3.** CD spectra (A) and thermal denaturation curves of the synthetic and the expressed HU-p53TD peptides. (A) The secondary structure of the HU-p53TD peptides were measured by CD spectrometry at 4°C. The percentage of secondary structural elements were calculated. (B) The signals from the HU-p53TDs (synthetic and expressed in *E.coli*) were monitored by CD spectrometry at 222 nm between 4°C and 96°C. The fraction of denaturation at each temperature was plotted to generate the denaturation curves.

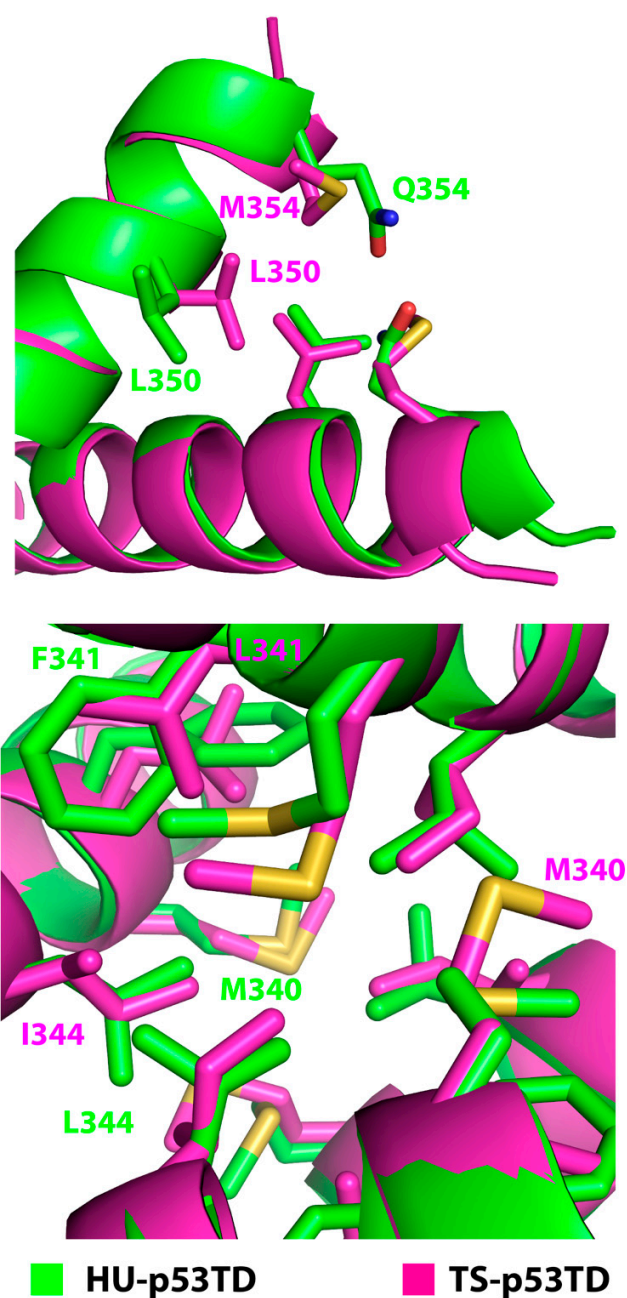

**Supplemental Figure S4.** Overlay of the regions containing the key structural differences between the HU-p53TD (green) and the TS-p53TD (Magenta). The upper panel shows a zoom of the C-terminal end of the  $\alpha$ -helix highlighting the side chains of residues L350 and Q354 of HU-p53TD (green) and the corresponding L350 and M354 of TS-p53TD (magenta). The lower panel shows the zoom of the central region of the  $\alpha$ -helix highlighting the side chains of residues M340, F341 and L344 of HU-p53TD (green) and the corresponding M340, L341 and I344 of TS-p53TD (magenta).



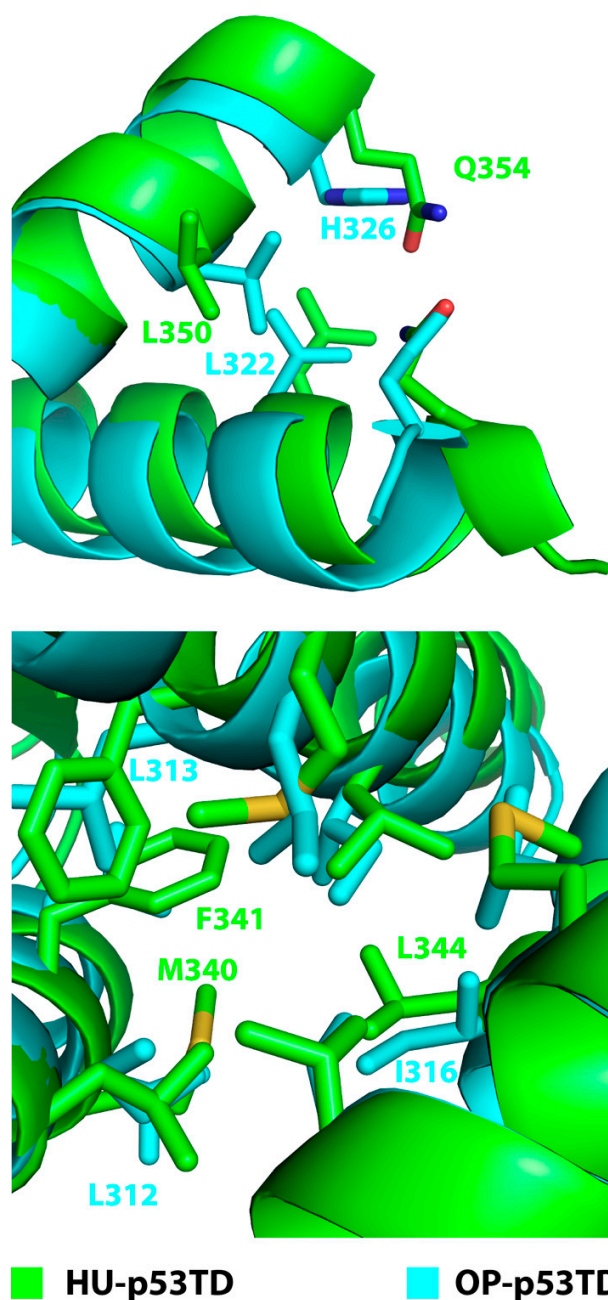

**Supplemental Figure S5.** Overlay of the regions containing the key structural differences between the HU-p53TD (Green) and the OP-p53TD (Aqua). The upper panel shows a zoom of the C-terminal end of the  $\alpha$ -helix highlighting the side chains of residues L350 and Q354 of HU-p53TD (Green) and the corresponding L322 and H326 of OP-p53TD (Aqua). The lower panel shows the zoom of the central region of the  $\alpha$ -helix highlighting the side chains of residues M340, F341 and L344 of HU-p53TD (Green) and the corresponding L312, L313 and I316 of OP-p53TD (Aqua)
